# Supplementary material
Source: MDPI journal article supplement (https://www.mdpi.com/2039-4713/13/4/35)
Supplement: s1 [file s1]

# Health risks from intake and contact with toxic metal-contaminated water from Pager River, Uganda

Patrick Onen <sup>1</sup>, Robin Akemkwene <sup>2</sup>, Caroline K. Nakiguli<sup>3</sup>, Daniel Nimusiima<sup>3</sup>, Daniel H. Ruma <sup>4</sup>, Alice V. Khanakwa<sup>5</sup>, Christopher Angiro <sup>6</sup>, Gadson Bamanya<sup>7</sup>, Boniface Opio <sup>8</sup>, Allan Gonzaga <sup>7</sup>, and Timothy Omara <sup>9,\*</sup>

<sup>1</sup> Department of Chemistry, Faculty of Science, University of Kerala, Kariavattom, Thiruvananthapuram 695581, India.

<sup>2</sup> Department of Chemistry, Faculty of Education and Humanities, Gulu University, Gulu P. O. Box 166, Uganda.

<sup>3</sup> Department of Chemistry, Faculty of Science, Mbarara University of Science and Technology, Mbarara P.O. Box 1410, Uganda.

<sup>4</sup> Department of Nutritional Sciences and Dietetics, Kyambogo University, Kampala P.O. Box 1, Uganda.

<sup>5</sup> Department of Environmental Health and Disease Prevention, Faculty of Public Health, Lira University, Lira, P. O. Box 1035, Uganda.

<sup>6</sup> School of Water, Energy and Environment, Water Science Institute, Cranfield University, College Road, Cranfield MK43 0AL UK.

<sup>7</sup> Department of Physical Sciences, Kampala International University, Kampala P.O. Box 20000, Uganda.

<sup>8</sup> Department of Science and Vocational Education, Lira University, Lira P.O. Box 1035, Uganda.

<sup>9</sup> Chemistry Division, Testing Department, Uganda National Bureau of Standards, Kampala P.O. Box 6329, Uganda.

\* Correspondence: prof.timo2018@gmail.com, Timothy.Omara@unbs.go.ug (T.O.)

# Current address: Institute of Chemistry of Renewable Resources, Department of Chemistry, University of Natural Resources and Life Sciences, Vienna (BOKU), Konrad-Lorenz-Str. 24, 3430 Tulln, Austria.

## Supplementary materials

Table S1. Pairwise Pearson Correlations between the studied physicochemical parameters and potentially toxic elements in water samples from Pager River, Northern Uganda

| Parameters  |             | N  | Correlation | 95% CI for $\rho$ | P-Value |
|-------------|-------------|----|-------------|-------------------|---------|
| Temperature | ECD         | 18 | 0.017       | (-0.453, 0.480)   | 0.947   |
| pH          | ECD         | 18 | 0.113       | (-0.374, 0.551)   | 0.655   |
| TDS         | ECD         | 18 | -0.204      | (-0.613, 0.290)   | 0.416   |
| Turbidity   | ECD         | 18 | 0.574       | (0.146, 0.821)    | 0.013*  |
| Cd          | ECD         | 18 | -0.320      | (-0.685, 0.172)   | 0.195   |
| Pb          | ECD         | 18 | 0.136       | (-0.353, 0.567)   | 0.589   |
| pH          | Temperature | 18 | -0.054      | (-0.508, 0.423)   | 0.830   |
| TDS         | Temperature | 18 | 0.277       | (-0.218, 0.659)   | 0.266   |
| Turbidity   | Temperature | 18 | -0.192      | (-0.605, 0.302)   | 0.446   |
| Cd          | Temperature | 18 | 0.257       | (-0.239, 0.646)   | 0.304   |
| Pb          | Temperature | 18 | -0.067      | (-0.518, 0.413)   | 0.791   |
| TDS         | pH          | 18 | -0.357      | (-0.706, 0.132)   | 0.146   |
| Turbidity   | pH          | 18 | 0.722       | (0.385, 0.889)    | 0.001** |
| Cd          | pH          | 18 | -0.535      | (-0.801, -0.090)  | 0.022*  |
| Pb          | pH          | 18 | -0.021      | (-0.483, 0.450)   | 0.934   |
| Turbidity   | TDS         | 18 | -0.187      | (-0.601, 0.307)   | 0.457   |
| Cd          | TDS         | 18 | 0.248       | (-0.247, 0.641)   | 0.320   |
| Pb          | TDS         | 18 | 0.448       | (-0.023, 0.757)   | 0.062   |
| Cd          | Turbidity   | 18 | -0.483      | (-0.775, -0.021)  | 0.042*  |
| Pb          | Turbidity   | 18 | 0.189       | (-0.304, 0.603)   | 0.452   |
| Pb          | Cd          | 18 | -0.121      | (-0.556, 0.367)   | 0.633   |

Note: ECD = Electrical conductivity, TDS = Total Dissolved Solids. \* Significant at the 0.05 level (2-tailed). \*\*Also significant at P<0.01 level (2-tailed).

Table S2. Eigen vectors and Eigen analysis of the correlation matrix for the PTEs and physicochemical parameters of water samples from Pager River, Northern Uganda.

| Variable                | First Component | Second Component | Third Component |
|-------------------------|-----------------|------------------|-----------------|
| ECD                     | 0.352           | 0.222            | -0.342          |
| Temperature             | -0.201          | 0.152            | -0.857          |
| pH                      | 0.485           | -0.071           | -0.145          |
| TDS                     | -0.303          | 0.606            | 0.005           |
| Turbidity               | 0.538           | 0.206            | -0.126          |
| Cd                      | -0.466          | -0.061           | -0.159          |
| Pb                      | 0.045           | 0.714            | 0.294           |
| Initial eigenvalues     | 2.6392          | 1.4760           | 1.0386          |
| Explained variance (%)  | 37.7            | 21.1             | 14.8            |
| Cumulative variance (%) | 37.7            | 58.8             | 73.6            |

Note: ECD = Electrical conductivity, TDS = Total Dissolved Solids. \* Significant at the 0.05 level (2-tailed).
